# Supplementary material
Source: HighWire-hosted journal article supplement (https://erj.ersjournals.com/content/57/6/2004270)
Supplement: inline-supplementary-material-1 [file inline-supplementary-material-1.pdf]

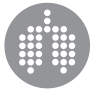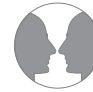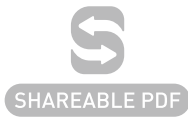

# Methacholine reactivity in lymphangioliomyomatosis is inversely related to FEV<sub>1</sub> and VEGF-D

Roberto Cassandro<sup>1</sup>, Davide Elia<sup>1</sup>, Antonella Caminati<sup>1</sup>, Gustavo Pacheco-Rodriguez<sup>2</sup>, Mario Stylianou<sup>3</sup>, Joel Moss<sup>2</sup> and Sergio Harari <sup>4</sup>

**Affiliations:** <sup>1</sup>Division of Pulmonary and Critical Care Medicine, San Giuseppe Hospital MultiMedica IRCCS, Milan, Italy. <sup>2</sup>Pulmonary Branch, National Heart, Lung, and Blood Institute, National Institutes of Health, Bethesda, MD, USA. <sup>3</sup>Office of Biostatistics Research, National Heart, Lung, and Blood Institute, National Institutes of Health, Bethesda, MD, USA. <sup>4</sup>Dept of Medical Sciences San Giuseppe Hospital MultiMedica IRCCS and Dept of Clinical Sciences and Community Health, University of Milan, Milan, Italy.

**Correspondence:** Joel Moss, Pulmonary Branch, National Heart, Lung, and Blood Institute, National Institutes of Health, 9000 Rockville Pike, Building 10, Room 6D05, MSC 1590, Bethesda, MD 20892-1590, USA. E-mail: mossj@nhlbi.nih.gov

 @ERSpublications

**Methacholine bronchoprovocation in LAM patients was used to assess airway reactivity. A negative methacholine challenge was associated with a lack of a response to  $\beta$ -adrenergic agonist, higher levels of FEV<sub>1</sub>, and higher levels of VEGF-D** <https://bit.ly/3aVTF12>

**Cite this article as:** Cassandro R, Elia D, Caminati A, *et al.* Methacholine reactivity in lymphangioliomyomatosis is inversely related to FEV<sub>1</sub> and VEGF-D. *Eur Respir J* 2021; 57: 2004270 [<https://doi.org/10.1183/13993003.04270-2020>].

This single-page version can be shared freely online.

*To the Editor:*

Lymphangioliomyomatosis (LAM) is a multisystem disease characterised by cystic lung destruction, leading to respiratory failure, and associated with kidney (*e.g.* angiomyolipomas (AML)) and lymphatic involvement (*e.g.* lymphangioliomyomas, chylous effusions) [1, 2]. LAM occurs sporadically or in association with tuberous sclerosis complex (TSC), an autosomal-dominant disorder characterised by mutations of the *TSC1* or *TSC2* genes. Lung destruction results from the proliferation of LAM cells, which possess neoplastic properties and are found in LAM lung nodules, in association with fibroblasts, mast cells, lymphocytes and lymphatic endothelial cells [3, 4]. LAM patients may show increases in serum levels of the lymphangiogenic factor, vascular endothelial growth factor-D (VEGF-D), a LAM biomarker used in differential diagnosis of cystic lung diseases and to identify LAM patients likely to respond to sirolimus treatment [5–7].
